# Supplementary material for: User-centred design for machine learning in health care: a case study from care management
Source: PubMed Central journal article supplement — BMJ Health Care Inform. 2022 Oct 11;29(1):e100656. doi: 10.1136/bmjhci-2022-100656 (PMC9557254; doi:10.1136/bmjhci-2022-100656), 2022-10-11
Supplement: bmjhci-2022-100656supp001.pdf [file bmjhci-2022-100656supp001.pdf]

# Supplementary Materials

## User-centred design for machine learning in health care: a case study from care management

### A. Process maps

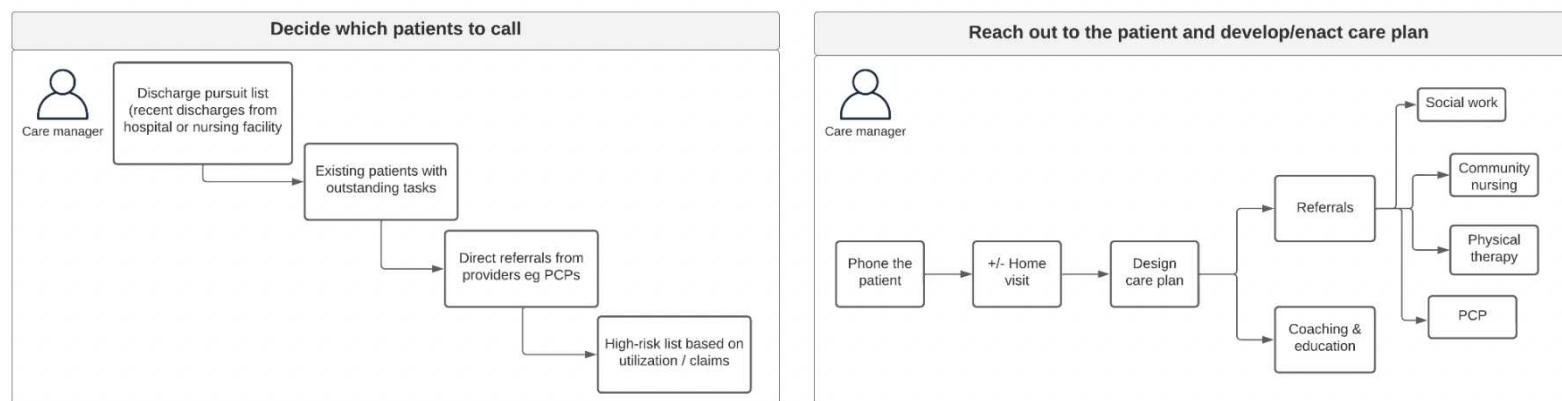

### B. Storyboards

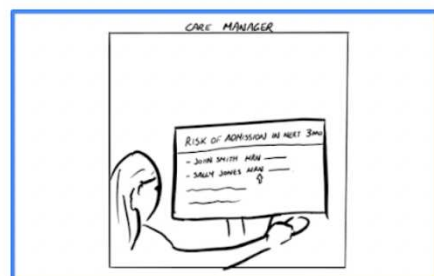

Top-level UI:  
Personalized admission risk score using  
EHR data

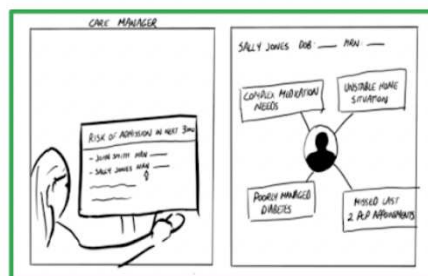

Second-level UI:  
Risk factor summary

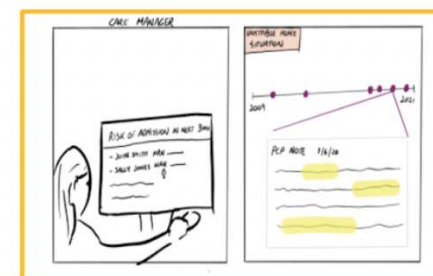

Second-level UI:  
Highlight snippets from the notes related  
to risk score

**Figure S1:** Example UX artifacts for the care management use case showing the evolution through (A) critical user journeys and (B) storyboards.

**Table S1:** Selected pain points mapped to possible ML formulations.

| Q1 → Pain point                                        |                                                                                                                                                                  | Q2 → Possible ML formulation(s)                                                                                                                         | Q3 → Actionability pathway                                                                          | Q4 → Optimisation criteria                                                                                       |
|--------------------------------------------------------|------------------------------------------------------------------------------------------------------------------------------------------------------------------|---------------------------------------------------------------------------------------------------------------------------------------------------------|-----------------------------------------------------------------------------------------------------|------------------------------------------------------------------------------------------------------------------|
| Description                                            | Quotes                                                                                                                                                           |                                                                                                                                                         |                                                                                                     |                                                                                                                  |
| Identifying and prioritising the highest risk patients | <i>“An analytics platform that can send the quality of referrals that a physician can send would certainly orient the team’s time in a more appropriate way”</i> | [Augmentation]<br>Use full outpatient records (structured data and notes) to predict emergency admissions or unplanned admissions for chronic diseases. | Care manager receives a list of rising risk patients each month                                     | Optimise for precision at c (capacity) relative to heuristic baselines                                           |
| Extracting relevant risk factors from the EHR          | <i>“If we can have a summary that skipped the part that is getting oriented to the patient research part that would be good”</i>                                 | [Automation]<br>Highlighting parts of the record representing modifiable risk factors.<br><br>Summarising patient history in text snippets              | Care manager reviews patient risk summary prior to outreach instead of manually sifting through EHR | Optimise for recall over precision as risk factors will still be reviewed with the patient in telephone outreach |
